# Supplementary material for: Is ovule packaging strategy in animal-pollinated plants correlated to the level of specialization of their pollination systems?
Source: Research Square preprint supplement (doi:10.21203/rs.3.rs-8038291/v1), 2025-11-20
Supplement: Supplementary file 2 [file d6dcf0773fcd31c216c39d48.xlsx]

## Sheet: Table 1
article title: Is ovule packaging strategy in animal-pollinated plants correlated to the level of specialization of their pollination systems? journal name: Plant-Arthropod Interaction Marcin ZYCH1,3, Katarzyna ROGUZ1,2, Justyna RYNIEWICZ1, Anna SZACIŁŁO1, Robert R. JUNKER2,3 1 Botanic Garden, Faculty of Biology, University of Warsaw, Aleje Ujazdowskie 4, 00-478 Warszawa, Poland; 2 Evolutionary E…
Table 1. List of the plant species lacking literature records of ovule numbers collected in 2016 and analyzed for the ovaries’ content in the lab. For each species, we collected 20 fully developed flowers from at least 10 individual plants. Ovules from dissected flowers were counted under a stereoscopic microscope.
Plant species	Family
Anthriscus sylvestris	Apiaceae
Arabidopsis thaliana	Brassicaceae
Asclepias tuberosa	Asclepiadaceae
Cardaminopsis halleri	Brassicaceae
Chamaenerion angustifolium	Onagraceae
Epilobium hirsutum	Onagraceae
Filipendula ulmaria	Rosaceae
Galeopsis sp	Lamiaceae
Galeopsis speciosa	Lamiaceae
Galium mollugo	Rubiaceae
Galium palustre	Rubiaceae
Lamium maculatum	Lamiaceae
Lamium purpureum	Lamiaceae
Linaria vulgaris	Plantaginaceae
Lychnis flos-cuculi	Caryophyllaceae
Lythrum salicaria	Lythraceae
Mentha arvensis	Lamiaceae
Myosotis palustris	Boraginaceae
Polygonum bistorta	Polygonaceae
Ranunculus repens	Ranunculaceae
Silene alba	Caryophyllaceae
Stellaria palustris	Caryophyllaceae
Symphytum officinale	Boraginaceae
Trifolium repens	Fabaceae
Valeriana officinalis	Valerianaceae
Veronica chamaedrys	Plantaginaceae
Veronica longifolia	Plantaginaceae

## Sheet: Table 2
Table 2. The final matrix of analyzed species contains data for 192 species representing 62 taxonomic families of the global flora.
species	familiy	distribution	average no ovules per pistill	Diptera	Coleoptera	Hymenoptera	Lepidoptera	other insects	birds	non-bird vertebrates	total no of floral visitors	P/O ratio	life form	data source (pollniation system and/or ovule number)
Caldesia grandis	Alismataceae	Asia	14.41	8	0	6	0	0	0	0	14	920,52	perenial	Gituru et al. (2002) Bot. Bull. Acad. Sin. 43: 231-240
Caldesia parnassifolia	Alismataceae	Asia, Africa, M Europe	6.371	7	0	5	0	0	0	0	12	3990,2	perenial	Gituru et al. (2002) Bot. Bull. Acad. Sin. 43: 231-240
Allium stellatum	Amaryllidaceae	N America	6								2	900	perenial	Robson (2014) Journal of Pollination Ecology, 14(21), pp 218-234 (pollinators); Molano-Flores (1999) Int. J. Plant Sci. 160(4):753-757
Tapirira guianensis	Anacaridaceae	S. America	1	27	21	50	2	7	0	0	107		tree	Krause (2008) Floral Biology, Flowering Phenology and Floral Visitors of Five Insect-Pollinated Tree Species in a Tropical Lowland Rainforest Remnant of Pernambuco, Brazil
Asimina obovata	Annonaceae	N. America	37.5	0	4	0	0	0	0	0	4	823	tree	Norman & Clayton (1986) Bulletin of the Torrey Botanical Club 113: 16-22
Asimina pygmaea	Annonaceae	N. America	24	0	5	0	0	0	0	0	5	470	shrub	Norman & Clayton (1986) Bulletin of the Torrey Botanical Club 113: 16-22, Flora of North America (flowers)
Polyalthia coffeoides	Annonaceae	Asia	14	1	2	1	1	11	0	0	22	722,6	tree	Ratnayke (2005) PHENOLOGY, POLLINATION ECOLOGY AND BREEDING SYSTEMS OF POLYALTHIA COFFEOIDES, P. KORINTI AND XYLOPIA CHAMPIONII (ANNONACEAE) IN SRI LANKA
Polyalthia korniti	Annonaceae	Asia	15	1	1	1	1	1	0	0	9	2296	tree	Ratnayke (2005) PHENOLOGY, POLLINATION ECOLOGY AND BREEDING SYSTEMS OF POLYALTHIA COFFEOIDES, P. KORINTI AND XYLOPIA CHAMPIONII (ANNONACEAE) IN SRI LANKA
Xylopia championii	Annonaceae	Sri Lanka	5	1	1	1	0	1 (?)	0	1	5		tree	Ratnayke (2005) PHENOLOGY, POLLINATION ECOLOGY AND BREEDING SYSTEMS OF POLYALTHIA COFFEOIDES, P. KORINTI AND XYLOPIA CHAMPIONII (ANNONACEAE) IN SRI LANKA				x
Angelica sylvestris	Apiaceae	Eurasia	2	44	6	15	1	3	0	0	69		perenial	Zych et al. (2007) Acta Agrobot
Anthriscus sylvestris	Apiaceae	Eurasia & Africa	2								38		annual	own sampling
Heracleum montegazzianum	Apiaceae	Kaukaz, później Europa, N Ameryka	2								48		perenial	Grace & Nelson (1981) New Phytol. 87: 413–423
Heracleum sphondylium	Apiaceae	Eurasia	2	54	13	24	10	7	0	0	108		perenial	Zych (2007) Plant Syst Evol				x
Ostericum palustre	Apiaceae	Eurasia	2	65	4	9	2	1	0	0	81		perenial	Zych et al. (2014) Plant Syst Evol 300:187-196
Serenoa repens	Areaceae	N. America	1	117	52	121					311		perenial	Deyrup & Deyrup (2012) Florida Entomologist 95: 711-730
Asclepias incarnata	Asclepiadaceae	N. America	58.2								134	1,69	perenial	Fishbein & Venable (1996) Ecology 77: 1061-1073 (visitors); Wyatt et al. (2000) Systematic Botany 25(2): 171-180
Asclepias syriaca	Asclepiadaceae	N. America	208.9								167	2,18	perenial	Fishbein & Venable (1996) Ecology 77: 1061-1073 (visitors); Wyatt et al. (2000) Systematic Botany 25: 171–180 (ovules); Howard & Barrows (2014) BMC Evolutionary Biology 14:144 (flowers)
Asclepias tuberosa	Asclepiadaceae	N. America	70.5						1		80	1,25	perenial	https://www.biodiversitylibrary.org/item/43820#page/35/mode/1up
Asclepias verticillata	Asclepiadaceae	N. America	48								185	1,31	perenial	Fishbein & Venable (1996) Ecology 77: 1061-1073 (visitors); Wyatt et al. (2000) Systematic Botany 25: 171–180 (ovules)
Symphyotrichum sericeum	Asteraceae	N America	1								21		perenial	Bino et al. (1982) New Phytol. 90, 315-319
Heterotheca villosa	Asteraceae	N America	1								15		perenial	Sun et al. (2006) Botanical Journal of the Linnean Society 150: 165–175
Symphyotrichum ericoides	Asteraceae	N America	1								11		perenial	Jakubska et al. (2005) Acta Botanica Silesiaca 2: 131_x0096_144.
Symphyotrichum ciliolatum	Asteraceae	N America	1								15		perenial	Suetsugu (2015) J Plant Res 128:115–125
Solidago nemoralis	Asteraceae	N America	1								45		perenial	Suetsugu (2015) J Plant Res 128:115–125
Solidago rigida	Asteraceae	N America	1								42		perenial	Suetsugu (2015) J Plant Res 128:115–125
Solidago canadensis	Asteraceae	N America	1								34		perenial	Suetsugu (2015) J Plant Res 128:115–125
Scorzonera hispanica	Asteraceae	Asia, Europe	1								24		biennial	Cervenkova & Munzbergova (2013) Plant Biology 16: 967–97
Erigeron glabellus	Asteraceae	N America	1								17		perenial	Robson (2014) Journal of Pollination Ecology, 14(21), pp 218-234 (pollinators)
Solidago ptarmicoides	Asteraceae	N America	1								16			Robson (2014) Journal of Pollination Ecology, 14(21), pp 218-234 (pollinators)
Erigeron strigosus	Asteraceae	N America, Europe - zadomowiony	1								10		biennial	Robson (2014) Journal of Pollination Ecology, 14(21), pp 218-234 (pollinators)
Helianthus subrhomboideu	Asteraceae		1								3			Robson (2014) Journal of Pollination Ecology, 14(21), pp 218-234 (pollinators)
Rudbeckia hirta	Asteraceae	N America	1								19		annual (sometimes bienial lub perenial)	Robson (2014) Journal of Pollination Ecology, 14(21), pp 218-234 (pollinators)
Symphyotrichum laeve	Asteraceae	N America	1								12			Robson (2014) Journal of Pollination Ecology, 14(21), pp 218-234 (pollinators)
Achillea millefolium	Asteraceae	Euroasia, N America	1								8		perenial	Robson (2014) Journal of Pollination Ecology, 14(21), pp 218-234 (pollinators)
Helianthus maximilliani	Asteraceae	N America	1								6		perenial	Robson (2014) Journal of Pollination Ecology, 14(21), pp 218-234 (pollinators)
Liatris ligulistylis	Asteraceae	N America	1								10			Robson (2014) Journal of Pollination Ecology, 14(21), pp 218-234 (pollinators)
Cirsium flodmanii	Asteraceae	N America	1								4		perenial	Robson (2014) Journal of Pollination Ecology, 14(21), pp 218-234 (pollinators)
Packera plattensis	Asteraceae	N America	1								9			Robson (2014) Journal of Pollination Ecology, 14(21), pp 218-234 (pollinators)
Gaillardia aristata	Asteraceae	N America	1								3		perenial	Robson (2014) Journal of Pollination Ecology, 14(21), pp 218-234 (pollinators)
Crepis runcinata	Asteraceae	N America	1								3		perenial	Robson (2014) Journal of Pollination Ecology, 14(21), pp 218-234 (pollinators)
Agoseris glauca	Asteraceae	N America	1								3		perenial	Robson (2014) Journal of Pollination Ecology, 14(21), pp 218-234 (pollinators)
Cirsium arvense	Asteraceae	Eurasia	1	43	6	1	16	0	0	0	67		perenial	Tiley Journal of Ecology 2010, 98, 938–983
Senecio cambrensis	Asteraceae	Europe	1	6	0	1	1	0	0	0	8		perenial	Ingram & Noltie (1995) Journal of Ecology 83: 537-546
Helianthus annuus	Asteraceae	N. America	1	2	0	9	4	0	0	0	14		annual	Ali et al. (2015) Acta zool. bulg. 67 (2): 235-240
Jacaranda oxyphylla	Bignoniaceae	S. America	113.28	0	0	10	0	0	1	0	11		shrub	GUIMARA˜ ES et al. (2008) Annals of Botany 102: 699–711; Yuriko (2007) Braz. arch. biol. technol. vol.50 no.6
Jacaranda rugosa	Bignoniaceae	S. America	43.6	0	0	16	0	0	0	0	16		shrub	Milet-Pinherio & Schlidnwein (2009) Plant Biology 11:131-141 (pollinators); Milet-Pinheiro & Schlindwein (2009) Plant Biology Plant Biology 11: 131–141
Myosotis palustris	Boraginaceae	Eurasia	4								7		perenial	Mabberley (2008) “Mabberley’s Plant-book. A Portable Dictionaryof Plants, their Classification and Uses”
Pulmonaria officinalis	Boraginaceae	Europe	4	3	0	7	1	0	0	0	11		perenial	Meeus et al. (2013) Journal of Ecology 101: 1353-1368
Symphytum officinale	Boraginaceae	Eurasia	4								6		perenial	Mabberley (2008) “Mabberley’s Plant-book. A Portable Dictionaryof Plants, their Classification and Uses”
Arabidopsis thaliana	Brassicaceae	Euroasia & N.America	55.66								2		annual	Cucinotta et al. (2014) Frontiers in Plant Science 5: 117
Cardaminopsis halleri	Brassicaceae	Euroasia	56.2								18		perenial	own sampling
Raphanus raphanistrum	Brassicaceae	Eurasia, Africa	7	9	0	19	2	0	0	0	30		annual	Sahli & Conner (2007) American Journal of Botany 94(2): 203–209
Alliaria petiolata (officinalis)	Brassicaeae	Europe, N Africa, W i S Asia	16	8	6	2	1	0	0	0	17		biennial	Susko & Lovett-Doust (2000) American Journal of Botany 87(1): 56–66; Knuth p. 1898 "Handbuch der blütenbiologie" (pollinators); Cavers et al. (1978) The biology of canadian weeds
Thlaspi arvense	Brassicaeae	Eurasia	11	2	2	5	0	10	0	0	19		annual	Groenevelt & Klein GCB Bioenergy (2013), doi: 10.1111/gcbb.12122 (visitors); Zhou Taiyan et al. (2001) Flora of China 8: 1–193 (ovules)
Ananas comosus var. Comosus	Bromeliaceae	S. America	43.5	0	0	1	14	0	4	0	19		perenial	Kudom & Kwapong (2010) Journal of Pollination Ecology, 2(5): 27-32;
Echinopsis terscheckii	Cactaceae	S. America	7750	0	2	6	13	0	4	0	25		perenial	Ortega-Baes et al. (2010) Plant Biology ISSN 1435-8603
Harrisia portoricensis	Cactaceae	M. America	2413	0	0	0	1	0	0	0	1	1058	perenial	Rojas-Sandoval & Melendez-Ackerman (2009) American Journal of Botany 96(12): 2270–2278 (visitors & ovules)
Mammillaria pectinifera	Cactaceae	N America (Mexico)	23.67	2	8	0	0	0	0	0	10		shrub	Valverde et al. (2015) Journal of Arid Environments 116: 26-32
Oreocereus celsianus	Cactaceae	S. America	1580	0	0	5	2	0	3	0	10		perenial	Larrea-Alca´zar & López (2011) Plant Syst Evol DOI 10.1007/s00606-011-0485-4
Adenophora khasiana	Campanulaceae	Asia	138	2	1	4	13	1	0	0	21	149	perenial	Gong & Huang (2014) Plant Biol 16: 843-847 (ovules); Liu & Huang (2012) Oecologia 173:1411:1423(visitors)
Campanula rotundifolia	Campanulaceae	N America, Asia, Europe	259.2								12		perenial	Robson (2014) Journal of Pollination Ecology, 14(21), pp 218-234 (visitors); Greenway & Harder (2007) Am. J. of B. 94: 840–846				x
Lobelia spicata	Campanulaceae	S. and M. America	135.071	0	0	4	1	1	0	0	6		perenial	MOLANO-FLORES & FAIVRE (2015) Plant Species Biology 30, 202–211 (ovules), Molano-Flores (2002) Journal of the Torrey Botanical Society 129(3), pp. 187-193 (pollinators) , Robson (2014) Journal of Pollination Ecology, 14(21), pp 218-234				x
Phyteuma spicatum	Campanulaceae	Europe	50.8	1	0	4	0	0	0	0	5		perenial	Wheeler & Hutchings (2002) Journal of Ecology 90: 581-591 (visitors & ovules)
Agrostemma githago	Caryophyllaceae	Eurasia, N. Africa	30	1	0	0	5	0	0	0	6	461±74	annual	Knuth p. 1898 "Handbuch der blütenbiologie" (pollinators); Jürgens et al. Sex Plant Reprod (2002) 14:279–289 (ovules)
Dianthus carthusianorum	Caryophyllaceae	Eurasia	44.5	0	0	0	5	0	0	0	5		perenial	Bloch et al. (2006) New Phytologist 169: 699–706 (visitors); Jürgens et al. (2002) Sex Plant Reprod 14:279–289 (ovules)
Dianthus deltoides	Caryophyllaceae	Eurasia	98	1	0	0	13	0	0	0	14		perenial	Knuth p. 1898 "Handbuch der blütenbiologie" (visitors); Jürgens et al. Sex Plant Reprod (2002) 14:279–289 (ovules)
Lychnis flos-cuculi	Caryophyllaceae	Eurasia	182								6		perenial	Jurgens et al. (2002) Sexual Plant Reproduction 14: 279-289 (ovules)
Silene acutifolia	Caryophyllaceae	Europe	45	5	0	8	4	0	0	0	17		perenial	Buide (2006) Annals of Botany 97: 289–297	pollinators
Silene alba	Caryophyllaceae	Eurasia & N. Africa	540								3		annual/biennial	Jurgens et al. (2002) Sexual Plant Reproduction 14: 279-289 (ovules); Jennersten OIKOS 52:3 (1988) (pollinators)
Silene ciliata	Caryophyllaceae	N. Mediterrean	66	4	0	0	7	0	0	0	11	200+/-38	perenial	Gime´nez-Benavides et al. (2007) Oikos 116: 1461 1472
Silene nutans	Caryophyllaceae	Eurasia	135	1	0	5	7	0	0	0	13	200+/-86	perenial	own sampling				x
Silene viscaria/ Viscaria vulgaris	Caryophyllaceae	Eurasia	315	5	0	14	26	0	0	0	45	205	perenial	Jurgens et al. (2002) Sexual Plant Reproduction 14: 279-289 (ovules); Jennersten OIKOS 52:3 (1988) (pollinators)				x
Stellaria palustris	Caryophyllaceae	Eurasia	72.3								1		perenial	own sampling
Fumana hispidula	Cistaceae	Mediterranean	6	2	4	5	0	0	0	0	11	4.594.28 ± 859.56	shrub	Carrio´ & Gu¨emes J Plant Res (2013) 126:33–40 (visitors & ovules)				x
Helianthemum caput-felis	Cistaceae	Mediter	6.25	7	15	23	0	3	0	0	48	4233,9	perenial	Agullo et al. (2015) Flora 217:75-81
Jacquemontia montana	Convolvulaceae	S. America	3	1	1	6	0	1	0	0	9	1.200/4	perenial	Silva, FO. et al. (2010) Braz. J. Biol. 70(3): 671-676
Cucurbita maxima ssp. Andreana	Cucurbitaceae	S. and M. America	369.07	2	4	3	2	0	0	0	11		annual	Ashworth & Galetto (2008) Plant Biology vol. 3: 398-404
Calluna vulgaris	Ericaceae	Eurasia, N. Africa	31.1	42	0	15	0	0	0	0	57		shrub	Descamps et al. (2015) Journal of Insect Science 15(1): 130 (visitors); Jacquemart (2003) Belg. Journ. Bot. 136 (2) : 154-164 (ovules)				x
Vaccinium uliginosum	Ericaceae	Eurasia, N. America	84.9	8	0	20	2	0	0	0	30		shrub	Mayer et al. (2012) PLOS ONE 7(11); Jacquemart (2003) Belg. Journ. Bot. 136 (2) : 154-164 (ovules)
Croton suberosus	Euphorbiaceae	N. and M. America	3	2	5	14	5	2	0	0	28		shrub	Narbona & Dirzo (2010) American Journal of Botany 97(4): 672–679
Anthyllis vulneraria subsp. vulgaris	Fabaceae	Eurasia, N. Africa	2	1	0	8	0	0	0	0	9	1827+/-474	biennial	Navarro (2000) American Journal of Botany 87(7): 980–985 (visitors); Galloni et al. (2007) Pl. Syst. Evol. 266: 147–164 (ovules); Sterk (1975) Acta Bot. Neerl. 24(3-4): 315-337
Astragalus striatus	Fabaceae	N America	11.6								1	1404 ± 87	perenial	Kudo & Harder (2005) Functional Ecology 19: 245–254 (ovules) & Robson (2014) Journal of Pollination Ecology, 14(21), pp 218-234 (pollinators)	wg. Platlist.org synonim Astragalus striatus
Caesalpinia echinata	Fabaceae	M. S. America	2.35	0	0	11	2	0	2	0	15	5631,2	tree	Borges et al. (2009) Flora 204: 111–130
Coronilla emerus	Fabaceae	Eurasia, N. Africa	14								10	3714±959	perenial	Galloni et al. (2008) Flora 203: 94–102 (visitors); Galloni et al. (2007) Pl. Syst. Evol. 266: 147–164 (ovules); Aronne (2012) The Scientific World Journal doi:10.1100/2012/381575
Cytisophyllum sessilifolium	Fabaceae	Europe	7.4								25	8623±2374	biennial	Galloni et al. (2008) Flora 203: 94–102 (visitors); Galloni et al. (2007) Pl. Syst. Evol. 266: 147–164 (ovules)
Cytisus scoparius	Fabaceae	Europe	14.7								4	3812±408	biennial	Galloni et al. (2008) Flora 203: 94–102 (visitors); Galloni et al. (2007) Pl. Syst. Evol. 266: 147–164 (ovules)
Dalea purpurea	Fabaceae	N America	2	18	5	102	3	5	0	0	133		perenial	Robson, Petersen, Moure & Hurd, Reed, Smith et al. (few observation) (visitors) & Cane (2006) Am. Midl. Nat. 156:193–197 (ovules); Keeler (2002) Demography of Plants in Open Space Prairies				x
Genista cilentina	Fabaceae	Mediterean	6								11	1689±507	shrub	Galloni et al. (2008) Flora 203: 94–102 (visitors); Galloni et al. (2007) Pl. Syst. Evol. 266: 147–164 (ovules); Bacchetta (2012) International Journal of Cytology 65:47-61
Genista radiata	Fabaceae	Europe	4.4								12	5790	shrub	Galloni et al. (2003) Plant Syst. Evol. 238: 127–137 (ovules); Galloni et al. (2008) Flora 203: 94–102 (visitors); http://www.beanstreesandshrubs.org/ (flowers)
Hedysarum coronarium	Fabaceae	Eurasia, N. Africa	3.7								8	20894±4164	perenial	Galloni et al. (2008) Flora 203: 94–102 (visitors); Galloni et al. (2007) Pl. Syst. Evol. 266: 147–164 (ovules)
Sclerolobium densiflorum	Fabaceae	S. America	1	26	16	22	1	11	0	0	76	19151+/-7465	tree	Krause (2008) Floral Biology, Flowering Phenology and Floral Visitors of Five Insect-Pollinated Tree Species in a Tropical Lowland Rainforest Remnant of Pernambuco, Brazil
Spartium junceum	Fabaceae	Eurasia, Africa	15.1								14	4240	shrub	Galloni et al. (2003) Plant Syst. Evol. 238: 127–137 (ovules); Galloni et al. (2008) Flora 203: 94–102 (visitors); http://www.beanstreesandshrubs.org/ (flowers)				x
Trifolium repens	Fabaceae	Eurasia & N. America	4								1			Dhar, Sharma, Sharma (2006) Current Science 91(4): 482-485; Mabberley (2008) “Mabberley’s Plant-book. A Portable Dictionaryof Plants, their Classification and Uses”
Vigna unguiculata	Fabaceae	Asia, Africa, southern Europe, and Central and South America	17.25	0	5	10	1	1	0	0	52		annual	Bathi & Srivastava (2014) IJSR 3(9): 1732-1738 (pollinators);Pasquet (1998) Agronomie 18: 61-70 (ovules); Ige et al. (2011) Modern Applied Science 5(4): 74-82
Centaurium erythraea	Gentianaceae	Eurasia, Africa	306.05	9?	0	6	3	0	0	0	18	328.9+26.8 (pop.A)/345.2+25.9 (pop.B)	biennial	Brys & Jacquemyn (2011) Annals of Botany 107: 917–925 (ovules & visitors)
Centaurium littorale	Gentianaceae	Eurasia	233.5	7?	0	6	2	0	0	0	15	156.3+30.9 (pop.A)/170.2+23.8 (pop.B)	biennial	Brys & Jacquemyn (2011) Annals of Botany 107: 917–925 (ovules & visitors)
Centaurium pulchellum	Gentianaceae	Eurasia, Africa	271.5	8?	0	1	1	0	0	0	10	74.8+17.0 (pop.A)/72.0+7.8 (pop.B)	annual	Brys & Jacquemyn (2011) Annals of Botany 107: 917–925 (ovules & visitors)
Gentiana lutea	Gentianaceae	Eurasia	95.5	3	7	20	4	0	0	0	34		perenial	Rossi et al. (2014) Flora 209: 164–171 (visitors); Rossi et al. (2015) Plant Ecology & Diversity
Paraboea rufescens	Gesneriaceae	Asia	1500	0	0	6	0	0	0	0	6		perenial	Gao et al. (2006) Annals of Botany 97: 371–376 (visitors & ovules)
Hamamelis virginiana	Hamamelidaceae	N. America	2	38	8	25	0	7	0	0	78		shrub	Anderson & Hill (2002) American Journal of Botany 89(1): 67–78; ovules: (Endress, 1977)
Krameria tomentosa	Krameriaceae	S America	2	1	0	21	0	0	0	0	22		biennial	Carneiro et al. (2015) Flora: 215 1–8
Galeopsis sp	Lamiaceae		4								2			Mabberley (2008) “Mabberley’s Plant-book. A Portable Dictionaryof Plants, their Classification and Uses”
Galeopsis speciosa	Lamiaceae	Eurasia	4								1		annual	Mabberley (2008) “Mabberley’s Plant-book. A Portable Dictionaryof Plants, their Classification and Uses”
Lamium maculatum	Lamiaceae	Eurasia	4								2		perenial	Mabberley (2008) “Mabberley’s Plant-book. A Portable Dictionaryof Plants, their Classification and Uses”
Lamium purpureum	Lamiaceae	Eurasia & N. Africa	4								5		annual/biennial	Mabberley (2008) “Mabberley’s Plant-book. A Portable Dictionaryof Plants, their Classification and Uses”
Mentha arvensis	Lamiaceae	Eurasia	4								1		perenial	Mabberley (2008) “Mabberley’s Plant-book. A Portable Dictionaryof Plants, their Classification and Uses”
Prunella vulgaris	Lamiaceae	Asia, Europe, S Africa, N America	4								1		perenial	Robson (2014) Journal of Pollination Ecology, 14(21), pp 218-234 (pollinators); Cruden & Miller-Ward (1981) Evolution, 35(5): 964-974 (ovules)
Tectona grandis	Lamiaceae	Asia	4	6	2	12	15	1	0	0	36	3253/1	tree	Tangmitcharoen & Owens (1997) Annals of Botany 79: 227–241; Mabberley (2008) “Mabberley’s Plant-book. A Portable Dictionaryof Plants, their Classification and Uses”
Persea americana	Lauraceae	North & Middle America	1	26	3	15	2	3	0	0	49		tree	Eardley & Mansell (1996) South African Avocado Growers’ Association Yearbook 19:36-38 (visitors); Evans et al. (2010) New Zealand Plant Protection 63: 214-18 (flowers)
Ocotea glomerata	Laureaceae	S. America	1	82	15	32	5	19	0	0	153		tree	Krause (2008) Floral Biology, Flowering Phenology and Floral Visitors of Five Insect-Pollinated Tree Species in a Tropical Lowland Rainforest Remnant of Pernambuco, Brazil
Eschweilera ovata	Lecythidaceae	S.America	14.8	0	1	7	0	0	0	0	8	37675 ± 8555	tree	Krause (2008) Floral Biology, Flowering Phenology and Floral Visitors of Five Insect-Pollinated Tree Species in a Tropical Lowland Rainforest Remnant of Pernambuco, Brazil
Erythronium umbilicatum	Liliaceae	N. America	29.2	0	0	12	0	0	0	0	12		perenial	Motten (1983) Oecologia 59: 351-359; Ecological Monographs (1986) 56(1): 21-42 (visitors & ovules)
Fritillaria meleagris	Liliaceae	Europe	148	2	0	12	0	0	0	0	14		perenial	Zych & Stpiczyńska (2012) Plant Biol 14:285-294
Linnaea borealis	Linnaeaceae	Eurasia, N. America	10.4	17		3					21	3546	shrub	Scobie & Wilcock (2009) Annals of Botany 103: 835–846 (visitors); Spencer et al. (1987) Canadian Journal of Botany 65: 2036–2046 (ovules)				x
Lythrum salicaria	Lythraceae	Eurasia & N. Africa	107								17		perenial	Caswell & Davis (2011) Plant Syst Evol 294:127–145
Pterandra pyroidea	Malpighiaceae	M. S. America	3	0	0	13	0	0	0	0	13		shrub	Cappellari et al. (2011) Annals of Botany 107: 1323–1334
Ceiba grandiflora	Malvaceae	M. America	120	0	0	0	2	0	0	4	6		tree	Quesada et al. (2003) Oecologia 135:400-406
Xerophyllum tenax	Melanthiaceae	N. America	7.5	18	7	12	0	0	0	0	37		perenial	Vance et al. (2004) American Journal of Botany 91(12): 2060–2068				x
Rhexia virginica	Melastomataceae	N. America	456.6	8		13	3		1		25	668	perenial	Larson & Barrett ( 1999) American Journal of Botany 86(4): 502–511(visitors & ovules)
Trichilia lepidota	Meliaceae	S. America	6	27	15	17	13	16	0	0	88		tree	Krause (2008) Floral Biology, Flowering Phenology and Floral Visitors of Five Insect-Pollinated Tree Species in a Tropical Lowland Rainforest Remnant of Pernambuco, Brazil
Menyanthes trifoliata	Menyanthaceae	Eurasia, Africa, N. America	19	1	1	2	2	0	0	0	6		perenial	Thompson 1998 Can. J. Bot. 76: 818–828 (ovules); Hewett Journal of Ecology, Vol. 52, No. 3 (Nov., 1964), pp. 723-735 (visitors)
Claytonia virginica	Montiaceae	N. America	6	4	0	12? (Nomada spp)	2	0	0	0	18		perenial	Motten et al. (1981) Ecology, 62(5): 1278-1287
Eucalyptus marginata	Myrtaceae	Australia	35.5	18	19	38	3	3	0	0	81		tree	Yates et al. (2005) Journal of the Royal Society of Western Australia 88: 147-153 (visitors); Wheeler (2004) (ovules)
Nelumbo nucifera	Nelumbonaceae	Asia, Australia	33	7	4	4	0	1	0	0	16		perenial	Li & Huang (2009) Annals of Botany 104(5): 845–851 (visitors & ovules)
Chamaenerion angustifolium	Onagraceae	Euroasia & N. America	593								4		perenial	Cruden & Jensen (1979) Am. J. Bot 66(8) 875-879
Epilobium hirsutum	Onagraceae	Eurasia & N. America	233.3								6		perenial	own sampling
Oenothera macrocarpa	Onagraceae	N. America	84	0	0	1	1	0	0	0	2		perenial	Moody-Weis & Heywood (2001) American Journal of Botany 88(9): 1615–1622
Chloraea lamellata	Orchidaceae	S America	599 833 +/- 167 861	2	1	2	1	0	0	0	6		perenial	Lehnebach & Riveros (2003) Biodiversity and Conservation 12:1741–1751
Comparettia coccinea	Orchideaceae	S America	1000	0	0	0	2	0	0	0	2		perenial	Pansarin et al. (2015): Flora 217:57-63
Hemipilia flabellata	Orchideaceae	Asia	1001	7	>2	7	10	1	0	0	>24		perenial	Yi-Bo Luo & Sing-Chi Chen (1998) Bot J Linn Soc 131:45-64
Eulophia alta	Orchideaceae	S&N Am, Af,	1002	0	0	17	2	0	0	0	19		perenial	Jürgens et al. (2009) Annals of Botany 104:897-912
Epipactis palustris	Orchideaceae	Europe	1000								102		perenial	Nillson (1978)
Earina aestivalis	Orchideaceae	New Zeland	1001	3	1	3	0	0	0	0	7		perenial	Lehnebach & Robertson (2004) Annals of Botany 93: 773-781
Earina autumnalis	Orchideaceae	New Zeland	1002	6	0	1	0	0	0	0	7		perenial	Lehnebach & Robertson (2004) Annals of Botany 93: 773-781
Earina mucronata	Orchideaceae	New Zeland	1000	3	1	0	0	0	0	0	4		perenial	Lehnebach & Robertson (2004) Annals of Botany 93: 773-781
Winika cunninghamii	Orchideaceae	New Zeland	1001	2	0	2	0	0	0	0	4		perenial	Lehnebach & Robertson (2004) Annals of Botany 93: 773-781
Pleurothallis johannensis	Orchideaceae	S. America	1002	3	0	0	0	0	0	0	3		perenial	Lehnebach & Robertson (2004) Annals of Botany 93: 773-781
Pleurothallis teres	Orchideaceae	S. America	1000	6	0	0	0	0	0	0	6		perenial	Borba & Semir (2001) Annals of Botany 88: 75±88
Pleurothallis fabiobarrosii	Orchideaceae	S. America	1001	2	0	0	0	0	0	0	2		perenial	Borba & Semir (2001) Annals of Botany 88: 75±88
Pleurothallis ochreata	Orchideaceae	S. America	1002	7	0	0	0	0	0	0	7		perenial	Borba & Semir (2001) Annals of Botany 88: 75±88
Pleurothallis adamantinensis	Orchideaceae	S. America	1000	5	0	0	0	0	0	0	5		perenial	Borba & Semir (2001) Annals of Botany 88: 75±88
Doritis pulcherrima	Orchideaceae	S-E Asia	1001	0	0	4	3	2	0	0	9		shrub	Xiaohua et al. (2012) Plant Biology 12:67
Orchis galilea	Orchideaceae	Asia	1000	0	0	1	0	0	0	0	1		perenial	Peter & Johnson (2006) Annals of Botany 97: 345–355
Changnienia amoena	Orchideaceae	Asia	1001	3	0	12	0	0	0	0	15		perenial	Peter & Johnson (2006) Annals of Botany 97: 345–355
Epipactis helleborine	Orchideaceae	Asia, Africa, Europe, S America(zawleczony)	1002	2	7	11	1	4	0	0	25		perenial	Ivri & Dafni (1977) New Phytologist 79: 173-177
Cymbidium macrorhizon	Orchideaceae	Asia	1000	1	0	1	0	0	0	0	2		perenial	Suetsugu (2015) J Plant Res 128:115–125
Cymbidium lancifolium	Orchideaceae	Asia	1001	1	0	1	0	0	0	0	2		perenial	Suetsugu (2015) J Plant Res 128:115–125
Cymbidium aberrans	Orchideaceae	Asia	1002	1	0	0	0	0	0	0	1		perenial	Suetsugu (2015) J Plant Res 128:115–125
Cephalanthera falcata	Orchideaceae	Asia	1000	2	1	5	1	0	0	0	9		perenial	Suetsugu (2015) J Plant Res 128:115–125
Eulophia foliosa	Orchideaceae	S Africa	1000	0	2?	0	0	0	0	0	2? (more than 2 was only visitors)		perenial	Ali et al. (2015) Acta zool. bulg. 67 (2): 235-240
Acrolophia cochlearis	Orchideaceae	S Africa	1001			1?					1? (more than 2 was only visitors)		perenial	Peter & Johnson (2006) Annals of Botany 97: 345–355
Epipactus cosnimilis	Orchideaceae	Asia, Africa	1002	8	0	0	0	0	0	0	8 pollinators - more ? visitors		perenial	Ivri & Dafni (1977) New Phytologist 79: 173-177
Bartsia alpina	Orobanchaceae	Europe, N. America	93.9	0	0	4	0	0	0	0	4	398.8	perenial	Taylor & Rumsey (2003) Journal of Ecology 91: 908-921 (visitors); Molau (1991) American Journal of Botany 78(3): 326-339 (ovules)
Parnassia palustris	Parnassiaceae	Eurasia, N America, N Africa	225								1		perenial	Robson (2014) Journal of Pollination Ecology, 14(21), pp 218-234 (pollinators); "Flora of the Canadian Arctic Archipelago" (2011) Aiken et al.
Passiflora herbertiana	Passiflorceae	Australia	476.27						3		3		perenial	Krosnick et al. (2015) Journal of Pollination Biology 16(9): 58-63 (visitors & ovules)			różne liczby zalążków w różnych artykułach
Isoplexis canariensis	Plantaginaceae	N. Africa	673	0	0	0	0	0	5	1	6		shrub	Rodr í guez-Rodr í guez & Valido (2008) American Journal of Botany 95(11): 1408–1415	Insect pollination was absent, and the few insect visitors acted as nectar thieves or secondary nectar robbers.'
Linaria vulgaris	Plantaginaceae	Eurasia	188.8								1		perenial	Arnold (1982) The American Midland Naturalist 107(2) 360-369
Veronica chamaedrys	Plantaginaceae	Eurasia	13								6	534	perenial	Scalone (2011)
Veronica longifolia	Plantaginaceae	Eurasia	89								7	633	perenial	Scalone (2011)
Gilia achilleifolia	Polemoniaceae	N. America	13.5	0	3	8	5	0	0	0	16		annual	Grant & Grant (1965) "Flower pollination in the Phlox Family"
Gilia angelensis	Polemoniaceae	N. America	24	4	1	7	2	0	0	0	14		annual	Grant & Grant (1965) "Flower pollination in the Phlox Family" (visitors); Prigge & Gibson (ovules)
Gilia capitata	Polemoniaceae	N. America	4.5	3	8	15	9	0	0	0	35		annual	Grant & Grant (1965) "Flower pollination in the Phlox Family" (visitors); Nagy & Rice (1997) Evolution 51(4): 1079-1089 (ovules)
Polemonium caeruleum	Polemoniaceae	Europe	29	18	4	12	4	1	0	0	39		perenial	Zych et al. (2013) Bot J Linn Soc 173:92-107
Polygala vayredae	Polygalaceae	Europe	2	1	0	14	10	0	0	0	25	2346	perenial	Castro et al. Plant Ecol (2013) 214:1233–1245 (visitors); Castro et al. (2007) (ovules)
Polygonum bistorta	Polygonaceae	Eurasia	1								60		perenial	own sampling
Primula apennina	Primulaceae	Europe	51	0	1	0	1	0	0	0	2		perenial	Fisogni et al. (2011) Plant Biosystems 145, No. 2: 353–361
Primula veris	Primulaceae	Eurasia	51.2	1	8	11	2	0	0	0	22		perenial	Brys & Jacquemyn (2009) Journal of Ecology 97: 581–600 (pollinators); Brys & Jacquemyn (2014) Annals of Botany
Aconitium lycoctonum	Ranunculaceae	Eurasia	28.5	0	0	5	0	0	0	0	5	5,3	perenial	Antoń et al. (2014) Acta Agrobotanica 67: 3-12; Bosch (2001) Flora 196: 101-113 (ovules)
Aconitium Napellus	Ranunculaceae	Europe	60.8	0	0	8	0	0	0	0	10	3,54	perenial	Knuth p. 1898 "Handbuch der blütenbiologie" (visitors); Bosch (2001) Flora 196: 101-113 (ovules); Heinrich (1979) Oecologia (Berl.) 40, 235-245 (flowers)
Adonis vernalis	Ranunculaceae	Eurasia	51.3	5	2	9	0	1	0	0	17	501	perenial	Knuth p. 1898 "Handbuch der blütenbiologie" (visitors); Denisow et al. (2014) Acta Soc Bot Pol 83(1):29–37
Aquilegia caerulea	Ranunculaceae	N. America	280.5	23	0	12	1	0	1	0	37		perenial	Brunet & Eckert (1998) Functional Ecology 12: 596–606 (ovules);Miller (1978) American Journal of Botany 65:406-414 (visitors)
Helleoborus foetidus	Ranunculaceae	Europe, N. Africa	11	0	0	9	0	0	0	0	9		perenial	Herrera et al. (2001) American Journal of Botany 88(6): 1025–1032 (visitors); Herrea et al. (2002) American Journal of Botany 89(10): 1570–1578
Nigella sativa	Ranunculaceae	Meditterean	96	0	0	7	0	0	0	0	7		annual	Khaled Adel Saleh Abu-Hammour (2008) (ovules); Zaitoun et al. (2008) Ital. J. Agron. / Riv. Agron., 2:125-130 (visitors)
Pulsatilla vulgaris	Ranunculaceae	Europe	60	5	4	20	0	1	0	0	30		perenial	Knuth p. 1898 "Handbuch der blütenbiologie"; Wells&Barling (1971) Journal of Ecology 59(1): 275-292 (visitors); Walker (2011) Botanical Society of the British Isles (ovules)
Ranunculus repens	Ranunculaceae	Eurasia & N. America	34.4								18		perenial	own sampling
Trollius europaeus	Ranunculaceae	Eurasia	390	6	1	2	0	0	0	0	9		perenial	Jaeger et al. (2000) Evolutionary Ecology Research 2: 885–896; Knuth p. 1898 "Handbuch der blütenbiologie"; Pellmyr (1989) Oecologia 78: 53-59 (ovules)
Adolphia infesta	Rhamnaceae	N. America	3.5	44	2	15	6	1	0	0	68		shrub	Medan (2015) Journal of Pollination Biology 16(12): 82-90 (visitors & ovules)
Ziziphus mistol	Rhamnaceae	S America	2.5	12	6	8	1	0	0	0	27		tree	Cerino et al. (2015) Flora 211:18-25			Kwiatostany
Eriobotrya japonica	Rosaceae	Asia	10	4	0	2	2	0	2	0	10	9536,1	tree	Fang & Chen & Huang (2012) Annals of Botany 109(2): 379–384 (visitors & ovules)
Filipendula ulmaria	Rosaceae	Eurasia	11.7								32		perenial	own sampling
Fragaria virginiana	Rosaceae	N America	90.4								4		perenial	Robson (2014) Journal of Pollination Ecology, 14(21), pp 218-234 (pollinators); Ashman & Hitchens (2000) American Journal of Botany 87(2): 197–204
Geum rivale	Rosaceae	Eurasia, N America	107	0	3	13	0	0	0	0	16		perenial	Taylor Jour nal of Ecology 1997, 85, 721-73 (ovules); Knuth p. 1898 "Handbuch der blütenbiologie" (visitors)
Geum urbanum	Rosaceae	Eurasia, N. Africa	20	3	2	1	0	0	0	0	6		perenial	Taylor Journal of Ecology 1997, 85, 705-720 (ovules); Knuth p. 1898 "Handbuch der blütenbiologie" (visitors)
Galium boreale	Rubiaceae	N America, Asia, Europe	2								11		perenial	Robson (2014) Journal of Pollination Ecology, 14(21), pp 218-234 (pollinators); http://www.theodora.com/encyclopedia/r/rubiaceae.html (ovules)
Galium mollugo	Rubiaceae	Eurasia & N. Africa	2								1		annual	http://www.theodora.com/encyclopedia/r/rubiaceae.html
Galium palustre	Rubiaceae	Eurasia & N. Africa & N. America	2								9		annual	http://www.theodora.com/encyclopedia/r/rubiaceae.html
Palicourea padifolia	Rubiaceae	M. America	2	0	0	2	1	0	11	0	14		shrub	Ornelas et al. (2004) American Journal of Botany 91(7): 1052–1060 (visitors); Gonzales et al. (2005) Annals of Botany 95: 371–378 (ovules)
Dictamnus albus	Rutaceae	Eurasia	14.63	1	0	7	0	0	0	0	8		perenial	Fisogni et al. (2011) Plant Biology 13: 848–856
Withania aristata	Solanaceae	Canary Island	17.7	0	0	4	0	0	0	0	4	17200	shrub	Anderson (2006) American Journal of Botany 93(9): 1295–1305
Valeriana officinalis	Valerianaceae	Eurasia	1								14		biennial/oerenial	Patočka & Jakl (2010) Journal of Applied Biomedicine 8:11-18
Stachytarpheta jamaicensis	Verbenaceae	Caribbean	2	0	0	3	18	0	0	0	21	41	shrub	Lakshmi & Raju CURRENT SCIENCE, VOL. 100, NO. 1, 10 JANUARY 2011				x
Roscoea purpurea	Zingiberaceae	Asia	45.95	1	0	0	0	0	0	0	1	324,12	perenial	Paudel et al. (2015) Ecology and Evolution 5(22): 5240–5251 (visitors & ovules)
